# Supplementary material
Source: MDPI journal article supplement (https://www.mdpi.com/2073-4352/11/3/273)
Supplement: s1 [file s1]

## Affinity and structural analysis of the U1A RNA recognition motif with engineered methionines for crystallization and phasing

Yoshita Srivastava<sup>1,‡</sup>, Rachel Bonn-Breach<sup>1,‡</sup>, Sai Shashank Chavali<sup>1,‡</sup>, Geoffrey M. Lippa<sup>1,3</sup>, Jermaine L. Jenkins<sup>1,2</sup> and Joseph E. Wedekind<sup>1,\*</sup>

<sup>1</sup>Department of Biochemistry & Biophysics and Center for RNA Biology, University of Rochester School of Medicine & Dentistry, Rochester NY 14642, USA

<sup>2</sup>Structural Biology and Biophysics Facility, University of Rochester School of Medicine & Dentistry, Rochester NY 14642, USA

<sup>3</sup>Present address: Division of Biology, Alfred University, Alfred, NY 14802

\*Correspondence: joseph.wedekind@rochester.edu; Tel.: +1 585 273-4516

### Supplementary Methods

#### Equations for ITC fitting

ITC data for Figures 3 and 3 were fit to a 1:1 binding model. The variables are defined as follows:

$K$  = Binding constant  
 $n$  = number of sites on the receptor  
 $V_o$  = Active cell volume  
 $M_t$  = Bulk concentration of macromolecule in  $V_o$   
 $M$  = Free concentration of macromolecule in  $V_o$   
 $X_t$  = Bulk concentration of ligand  
 $X$  = Free concentration of ligand  
 $\theta$  = Fraction of sites occupied by ligand  $X$

$$K = \frac{\theta}{(1 - \theta) [X]} \quad (\text{eqn. 1})$$

$$X_t = [X] + n\theta M_t \quad (\text{eqn. 2})$$

Combining equations (1) and (2)

$$\theta^2 - \theta \left[ 1 + \frac{X_t}{nM_t} + \frac{1}{nKM_t} \right] + \frac{X_t}{nM_t} = 0 \quad (\text{eqn. 3})$$

The heat content ( $Q$ ) of the solution is considered relative to unliganded species contained in the active cell volume  $V_o$  at fractional saturation  $\theta$  is given by:

$$Q = n\theta M_t \Delta H V_o \quad (\text{eqn. 4})$$

Here,  $\Delta H$  denotes the molar heat of ligand binding;  $\theta$  is solved from quadratic eqn. 3, which when substituted into eqn. 4 gives the total heat content  $Q$ . Combining equations gives:

$$Q = \frac{nM_t \Delta H V_o}{2} \left[ 1 + \frac{X_t}{nM_t} + \frac{1}{nKM_t} - \sqrt{\left( 1 + \frac{X_t}{nM_t} + \frac{1}{nKM_t} \right)^2 - \frac{4X_t}{nM_t}} \right] \quad (\text{eqn. 5})$$

The expression in eqn. 5 is suitable for any given  $n$ ,  $K$  and  $\Delta H$  at the end of every  $i^{\text{th}}$  injection. However, eqn. 5 can be used only to calculate total heat content of solution contained in the volume  $V_o$ . Since every injection releases an additional volume of the ligand ( $\Delta V_i$  = injection volume), the change in heat content upon injection (i.e.,  $i-1$  to  $i^{\text{th}}$ ) is the parameter of interest. Accordingly, for each injection a correction is made for the additional added volume; this assumes mixing and associated kinetics are fast. Hence, the heat effect resulting from the liquid in the displaced volume is equivalent (~50%) to the heat effect due to the remaining volume  $V_o$ . The expression for heat released after every  $i^{\text{th}}$  injection ( $\Delta Q(i)$ ) is given by:

$$\Delta Q(i) = Q(i) + \frac{dV_i}{V_o} \left[ \frac{Q(i) + Q(i-1)}{2} \right] - Q(i-1) \quad (\text{eqn. 6})$$

The process of fitting ITC data subsequently involves four steps: *i*) preliminary estimations of  $n$ ,  $K$ , and  $\Delta H$  — are made by the ITC software; *ii*) the  $\Delta Q(i)$  is then calculated for each injection and the values are compared with the heats measured from experimental injections; *iii*) this improves the initial estimates of  $n$ ,  $K$ , and  $\Delta H$  by standard Marquardt fitting methods; and *iv*) the procedure is iterated until there is no substantial improvement of the fit. Note; this description was adapted from reference [1].

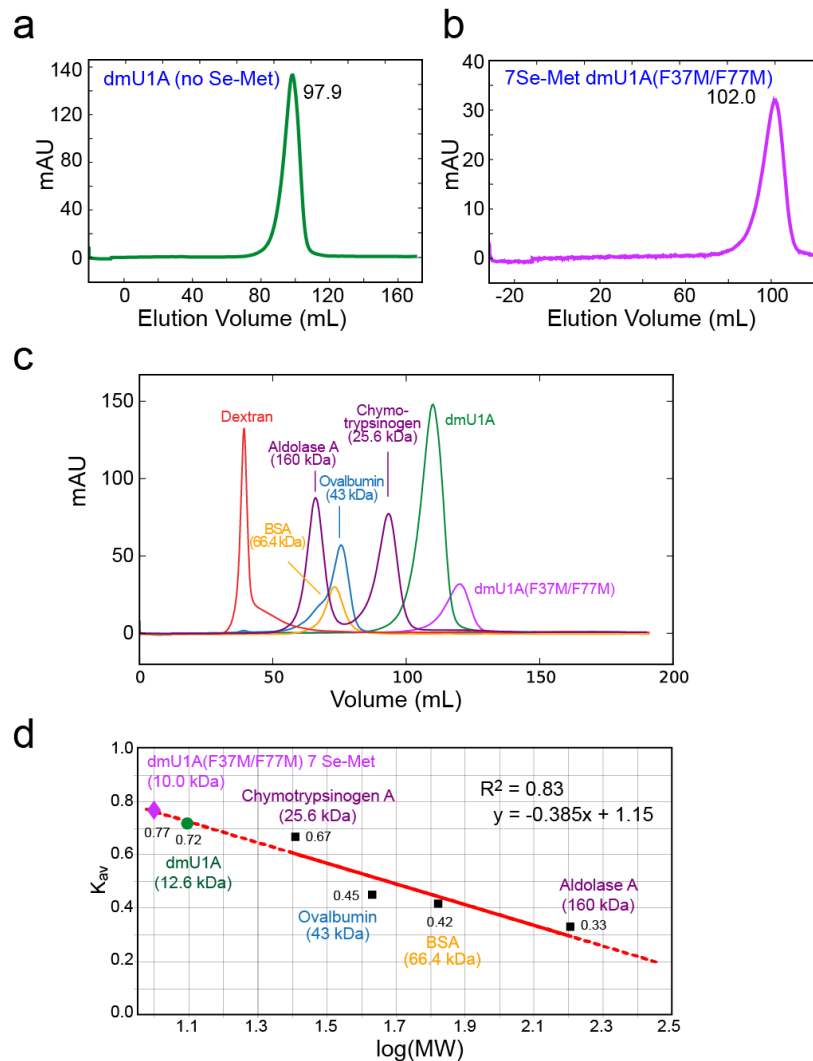

**Figure S1. Sephacryl S-300 HR (16/60) size-exclusion chromatography profiles for dmU1A and dmU1A(F37M/F77M) and molecular-weight standard curve. (a)** A representative gel filtration profile is shown for dmU1A prepared in the absence of selenomethionine. The observed elution volume ( $V_e$ ) was 97.9 mL. The protein concentration was  $\sim 150 \mu\text{M}$ ; see Section 2.2 of main text for details. **(b)** Gel filtration profile for dmU1A(F37M/F77M) labeled with selenomethionine. The sample concentration was  $\sim 150 \mu\text{M}$ . The observed total column volume,  $V_t$ , was 102.0 mL. **(c)** Gel filtration profiles were measured for MW standards aldolase A, BSA, ovalbumin and chymotrypsinogen A. Blue dextran was used to define the void volume ( $V_o$ ) of 39.14 mL. The bed volume defined by the manufacturer was 120.36 mL. **(d)** A molecular weight calibration curve was generated by plotting  $K_{av}$  versus  $\log(\text{MW})$  for the known standards in part c; here  $K_{av} = (V_e - V_o)/(V_t - V_o)$  as described [2]. Based on empirical measurements of  $K_{av}$  for dmU1A and dmU1A(F37M/F77M), their molecular weights were estimated to be 12.6 kDa and 10.0 kDa (shown above); these values agree well with the true molecular weights of 11.4 kDa and 11.5 kDa for these samples.

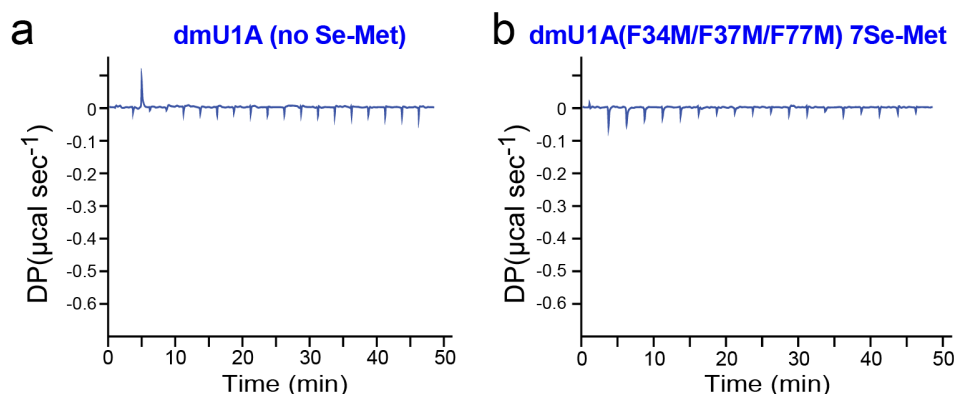

**Figure S2. ITC analysis of dmU1A and dmU1A(F37M/F77M) to assess heats of dilution. (a)** A titration of 150  $\mu\text{M}$  dmU1A into buffer is shown. Here, the heat resulting from each injection of protein into RNA is comparable to the heat of dilution measured after saturation of hplI RNA with the titrated protein, as shown in **Figure 3b**. In contrast, the expected heat of dilution from a dimer-to-monomer transition is expected to be significantly larger [3]. **(b)** Titration of 150  $\mu\text{M}$  selenomethionine-labeled dmU1A(F37M/F77M) into buffer. The heat resulting from each injection of protein into RNA is comparable to the heat of dilution measured after saturation of hplI RNA with the titrated protein, as shown in **Figure 3d**. These observations demonstrate that the protein does not undergo an appreciable dimer-to-monomer transition that results from dilution during injection into the calorimeter sample cell.

---

**Table S1: Intensity statistics for the Se-Met dmU1A(F37M/F77M)-preQ<sub>1</sub>-II riboswitch complex**

---

**Data Collection**

|                                       |                            |
|---------------------------------------|----------------------------|
| Wavelength (Å)                        | 0.98                       |
| Resolution range (Å)                  | 50.00 – 5.50 (5.59 – 5.50) |
| Space group                           | <i>F</i> 2 3               |
| <i>a</i> = <i>b</i> = <i>c</i> (Å)    | 240.2                      |
| $\alpha = \beta = \gamma$ (°)         | 90.0                       |
| Unique reflections                    | 12986                      |
| Multiplicity                          | 3.5 (3.3)                  |
| Completeness                          | 97.6 (93.0)                |
| Mean <i>I</i> / $\sigma$ ( <i>I</i> ) | 10.7 (1.7)                 |
| <i>R</i> <sub>sym</sub>               | 11.6 (54.3)                |

---

## References

1. Appendix: Equations used for fitting ITC data, ITC data analysis in Origin. ITC Tutorial guide – version 07. **2004**, MicroCal ITC LLC, pp 104-113.
2. Scopes, R.K. in Protein Purification: Principles and Practice, 3<sup>rd</sup> Edition. **1994**, Springer Verlag, New York. pp. 1-380.
3. Fernando, H.; Chin, C.; Rosgen, J.; Rajarathnam, K. Dimer dissociation is essential for interleukin-8 (il-8) binding to CXCR1 receptor. *J. Biol. Chem.* **2004**, 279, 36175-36178.
